# Supplementary material
Source: PubMed Central journal article supplement (PMC3191001)

# Supplemental Figure S2

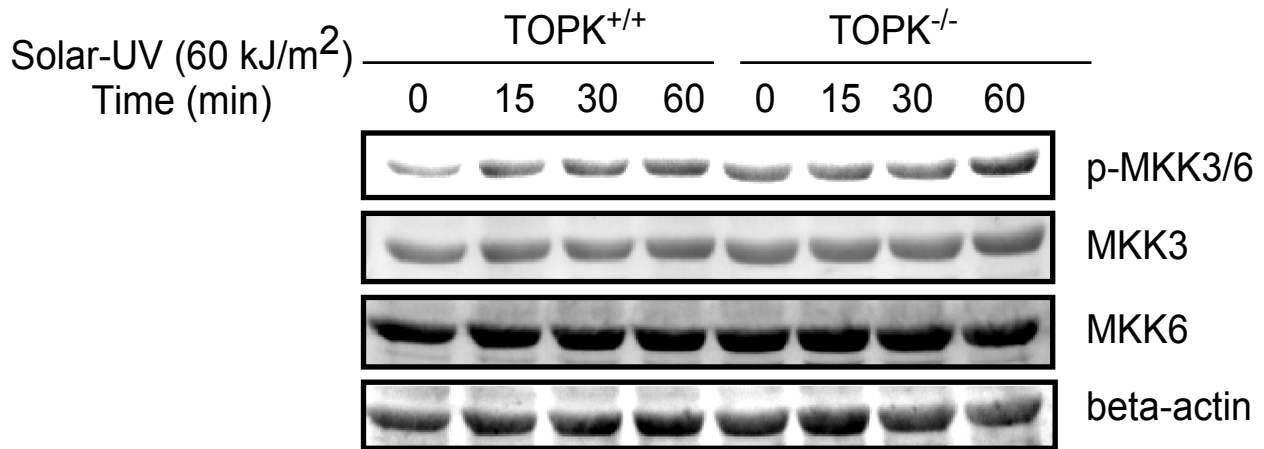

Supplement: supp_M111.225813_jbc.M111.225813-3.pdf [file supp_M111.225813_jbc.M111.225813-3.pdf]
